# Supplementary material for: Gene Regulatory Logic for Reading the Sonic Hedgehog Signaling Gradient in the Vertebrate Neural Tube
Source: PubMed Central journal article supplement (PMC3267043; doi:10.1016/j.cell.2011.10.047), 2012-01-20
Supplement: mmc1.pdf [file mmc1.pdf]

**Table S1. Standardized Nomenclature for Mouse Embryo Staging, Related to Figure 1**

| <b>Neural tube time<br/>(hph; hours post headfold stage)</b> | <b>Embryonic<br/>day</b> | <b>Number of<br/>somites</b> |
|--------------------------------------------------------------|--------------------------|------------------------------|
| 0hph                                                         | E7.5                     | 0 (headfold stage)           |
| 8hph                                                         | E8.0                     | 3-4                          |
| 18hph                                                        | E8.4                     | 8-9                          |
| 20hph                                                        | E8.5                     | 10-11                        |
| 40hph                                                        | E8.75                    | 20-22                        |
| 50hph                                                        | E9.0                     | 25-27                        |
| 60hph                                                        | E9.5                     | 30-32                        |
| 70hph                                                        | E10.0                    | 35-37                        |
| 80hph                                                        | E10.5                    | 40                           |
| 90hph                                                        | E11.0                    | NA                           |
| 100hph                                                       | E11.5                    | NA                           |

**Table S2. Set of Parameter Values Generating the Relevant Biological Outputs,  
Related to Figure 4  
(Initial value for P =3)**

| <b>Parameters</b> | <b>Description</b>                                                    | <b>Value</b> |
|-------------------|-----------------------------------------------------------------------|--------------|
| $\alpha$          | Maximum rate of P                                                     | 3            |
| $\beta$           | Maximum rate of O                                                     | 5            |
| $\gamma$          | Maximum rate of N                                                     | 5            |
| $h_1$             | Strength of N repression on P                                         | 6            |
| $h_2$             | Strength of O repression on P                                         | 2            |
| $h_3$             | Strength of N repression on O                                         | 5            |
| $h_4$             | Strength of O repression on N                                         | 1            |
| $h_5$             | Strength of P repression on N                                         | 1            |
| $k_1$             | Rate of P degradation                                                 | 1            |
| $k_2$             | Rate of O degradation                                                 | 1            |
| $k_3$             | Rate of N degradation                                                 | 1            |
| $O_{critP}$       | Critical value of O for which P value has reached half of its maximal | 1            |
| $N_{critP}$       | Critical value of N for which P value has reached half of its maximal | 1            |
| $O_{critN}$       | Critical value of O for which N value has reached half of its maximal | 1            |
| $N_{critO}$       | Critical value of N for which O value has reached half of its maximal | 1            |
| $P_{critN}$       | Critical value of P for which N value has reached half of its maximal | 1            |
| $n$               | Hill coefficient of G cooperativity on O                              | 1            |
| $m$               | Hill coefficient of G cooperativity on N                              | 1            |

**Table S3. Identification of the Parameters Robust or Sensitive to a 2-Fold Increase or Decrease in Their Values, Related to Figure 4**

The tick marks indicate the parameter changes for which the system adopts the biological relevant outputs over time or when G is increased, as well as in conditions where P or O were removed ( $\alpha$  or  $\beta=0$ , respectively). A, B, C, D indicate that the system fails to adopt the biological relevant output when the parameter is changed. In failure A, the system adopts an  $O^{\text{HIGH}}$  state for all values of G above a certain threshold and N is never induced. B indicates that in the absence of O, P prevails for all values of G and N is never induced. P, O and N coexist even at high values of G in Failure C. In Failure D, O is not induced for any value of G.

| <b>Parameters</b> | <b>Value doubled</b> | <b>Value halved</b> |
|-------------------|----------------------|---------------------|
| $\alpha$          | ✓                    | ✓                   |
| $\beta$           | A                    | ✓                   |
| $\gamma$          | ✓                    | A,B                 |
| $h_1$             | ✓                    | ✓                   |
| $h_2$             | ✓                    | ✓                   |
| $h_3$             | ✓                    | ✓                   |
| $h_4$             | A                    | ✓                   |
| $h_5$             | B                    | ✓                   |
| $k_1$             | ✓                    | B                   |
| $k_2$             | ✓                    | A                   |
| $k_3$             | A,B                  | ✓                   |
| $N_{critP}$       | C,B                  | ✓                   |
| $O_{critP}$       | ✓                    | ✓                   |
| $N_{critO}$       | A                    | D                   |
| $O_{critN}$       | ✓                    | A                   |
| $P_{critN}$       | ✓                    | ✓                   |
| $n$               | ✓                    | ✓                   |
| $m$               | ✓                    | ✓                   |
